# Supplementary material for: TR3 Modulates Platinum Resistance in Ovarian Cancer
Source: Oxford University Press journal article supplement (doi:10.1158/0008-5472.can-12-4560), 2013-05-30
Supplement: 00085472can124560-sup-can-12-4560_supplementary_table_1.xlsx [file 00085472can124560-sup-can-12-4560_supplementary_table_1.xlsx]

## Sheet: Sheet1
study_id	% TR3 +ve	Progression free survival (Years)	Overall survival (Years)	Age at diagnosis	Tumor stage	Tumor grade	Surgical debulking	Platinum sensitivity	Type of sensitivity	Histology	Epithelial type
VOC-A-001	21.23	0.84	0.84	36.44	IIC	Grade 3	no residual	no		epithelial	mucinous
VOC-A-002	89.835		0.57	54.62	IIIC	Grade 2	0.5-2 cm			epithelial	serous/papillary
VOC-A-003	16.555	1.15	1.15	76.02	IIIC	Grade 3	0.5-2 cm	no		epithelial	serous/papillary
VOC-A-004	60.18	0.02	0.02	72.63	IIIC	Grade 3	> 2 cm			epithelial	serous/papillary
VOC-A-006	94.915	1.61	2.8	60.61	IIIC	Grade 3	0.5-2 cm	yes	Remission > 12 months	epithelial	serous/papillary
VOC-A-007	68.995	0.86	5.88	43.33	IIIC	Grade 3	0.5-2 cm	yes	Remission > 12 months	epithelial	serous/papillary
VOC-A-008	49.6525	2.92	6.25	61.81	IIIC	Grade 2	< 0.5 cm	yes	Remission > 12 months	epithelial	serous/papillary
VOC-A-009	21.29	3.64	6.38	56.14	IIIC	Grade 3	> 2 cm	yes	Remission > 12 months	epithelial	serous/papillary
VOC-A-012	89.93		1.77	55.04	IIIC	Grade 2	0.5-2 cm			epithelial	serous/papillary
VOC-A-013	74.9925	2.18	6.09	61.17	IIIC	Grade 3	no residual	yes	Remission > 12 months	epithelial	serous/papillary
VOC-A-014	75.035	1.45	2.79	53.66	IIIC	Grade 1	no residual	yes	Remission > 6 months	epithelial	serous/papillary
VOC-A-015	75.7025	1.97	5.73	45.63	IIIC	Grade 3	no residual	yes	Remission > 12 months	epithelial	serous/papillary
VOC-A-016	91.96	1.67	6.27	43.98	IIIC	Grade 3	> 2 cm	yes	Remission > 12 months	epithelial	serous/papillary
VOC-A-017	75.0725		1.5	45	IIIC	Grade 2	0.5-2 cm			epithelial	endometrioid
VOC-A-018	12.83	0.53	0.53	53.14	IIIC	Grade 3	> 2 cm	no		epithelial	clear cell
VOC-A-020	85.03		0.85	36.45	IA	Grade 2				other
VOC-A-024	49.2875		6.7	56.05	IC	Grade 1	no residual	yes	Remission > 12 months	other
VOC-A-025	14.345		2.15	18.9	unstaged	Grade 1		yes	Remission > 12 months	epithelial	mucinous
VOC-A-026	81.5967	0.9	2.08	59.38	IV	Grade 3	> 2 cm	yes	Remission > 6 months	epithelial	serous/papillary
VOC-A-027	90.8375	7.01	7.01	79.96	IIIC	Grade 2	< 0.5 cm	yes	Remission > 12 months	epithelial	serous/papillary
VOC-A-028	70.8533	1.71	3.5	54.6	IV	Grade 3	0.5-2 cm	yes	Remission > 12 months	epithelial	serous/papillary
VOC-A-030	17.87		2.44	68.18	IIIC	Grade 3	> 2 cm	no		epithelial	serous/papillary
VOC-A-032	43.5	0.16	0.16	84.07	IIIC	Grade 3	< 0.5 cm	no		epithelial	serous/papillary
VOC-A-033	75.09	6.32	6.96	45.59	IIIC	Grade 3	no residual	yes	Remission > 12 months	epithelial	serous/papillary
VOC-A-034	87.565	1.51	3	66.67	IIIC	Grade 3		yes	Remission > 12 months	epithelial	serous/papillary
VOC-A-036	79.5425	1.5	6.39	81.21	unstaged	Grade 3	< 0.5 cm	yes	Remission > 6 months	epithelial	serous/papillary
VOC-A-037	32.69	6.67	6.67	57.25	IIIC	Grade 2	no residual	no		epithelial	serous/papillary
VOC-A-038	40.3533	1.4	3.7	41.74	IIIC	Grade 3	0.5-2 cm	yes	Remission > 6 months	epithelial	serous/papillary
VOC-A-039	80.795	1.23	2.96	61.19	IIIC	Grade 3		yes	Remission > 6 months	epithelial	serous/papillary
VOC-A-040	27.19	1.17	1.17	61.12	IIIC	Grade 3	> 2 cm	no		epithelial	serous/papillary
VOC-A-041	98.32	6.62	6.62	77.77	IA	Grade 1				epithelial	endometrioid
VOC-A-042	82.7867	7.24	7.24	47.79	IC	Grade 1	no residual	yes	Remission > 12 months	epithelial	endometrioid
VOC-A-043	88.6125	6.44	6.44	43.82	IA			yes	Remission > 12 months	epithelial	clear cell
VOC-A-044	36.4	2.63	2.63	65.89	IIIC	Grade 3	no residual	no		epithelial	mixed
VOC-A-045	20.02	5.9	5.9	84.72	IIIB		< 0.5 cm	yes	Remission > 12 months	other
VOC-A-047	57.615	3.41	3.41	60.33	IIIC	Grade 3	> 2 cm	yes	Remission > 12 months	epithelial	serous/papillary
VOC-A-048	78.12		0.39	57.94	IIIC	Grade 3	0.5-2 cm			other
VOC-A-052	68.815	3.56	3.56	30.45	IA	Grade 3	no residual	yes	Remission > 12 months	epithelial	mucinous
VOC-A-053	7.82667	3.17	3.17	64.23	IIIC		0.5-2 cm	no		epithelial	serous/papillary
VOC-A-055	54.49	7.01	7.01	52.27	IIC	Grade 2	< 0.5 cm	no		epithelial	serous/papillary
VOC-A-056	12.9	1.56	1.56	56.06	IIIC	Grade 3	0.5-2 cm	no		epithelial	serous/papillary
VOC-A-057	81.3475		0.88	56.99	IV	Grade 3	> 2 cm			epithelial	serous/papillary
VOC-A-058	70.9967	1.22	7	64.75	IIC	Grade 3	> 2 cm	yes	Remission > 6 months	epithelial	serous/papillary
VOC-A-059	36.7			66.39	IIIC	Grade 3	> 2 cm	no		epithelial	serous/papillary
VOC-A-060	13.4	1.19	1.19	69.39	IIIC	Grade 3	> 2 cm	no		epithelial	serous/papillary
VOC-A-061	82.92	1.34	5.36	63.28	IV	Grade 2	no residual	yes	Remission > 6 months	epithelial	serous/papillary
VOC-A-063	60.95			27.1	IIIB	Grade 2	< 0.5 cm			epithelial	serous/papillary
VOC-A-064	65.8167		1.79	53.07	IV	Grade 2	< 0.5 cm	no		epithelial	serous/papillary
VOC-A-065	76.92	1.8	3.66	78.69	IIIC	Grade 2	< 0.5 cm	yes	Remission > 12 months	epithelial	serous/papillary
VOC-A-066	65.59		6.32	70.14	IV	Grade 2				epithelial	mixed
VOC-A-067	36.4267		1.83	56.69	IIIC	Grade 3	< 0.5 cm	no		epithelial	serous/papillary
VOC-A-070	60.0633	1.25	3.95	57.48	IV	Grade 3	> 2 cm	yes	Remission > 6 months	epithelial	serous/papillary
VOC-A-071	49.65		1.41	54.38	IIIB	Grade 3	< 0.5 cm	no		epithelial	serous/papillary
VOC-A-072	19.96	2.23	2.23	50.11	IIIC	Grade 2	0.5-2 cm	no		epithelial	serous/papillary
VOC-A-074	97.1925	0.93	0.93	55.64	IA	Grade 3	no residual	yes	Remission > 6 months	epithelial	other
VOC-A-075	22.455	2.05	2.05	51.19	unstaged	Grade 2		yes	Remission > 12 months	epithelial	serous/papillary
VOC-A-076	68.0133	0.92	2.42	55.13	IIIC	Grade 3	> 2 cm	yes	Remission > 6 months	epithelial	serous/papillary
VOC-A-078	93.615	8.33	8.33	57.92	IC	Grade 2		yes	Remission > 12 months	epithelial	endometrioid
VOC-A-080	62.1575	6.32	6.32	61.33	IA		no residual	yes	Remission > 12 months	epithelial	clear cell
VOC-A-083	73.8867	3.48	3.48	71.39	IA	Grade 3		yes	Remission > 12 months	epithelial	clear cell
VOC-A-084	84.4633	3.73	3.73	72.63	IA	Grade 3				epithelial	other
VOC-A-085	77.5075		3.13	33.01	IA	Grade 1				epithelial	mucinous
VOC-A-086	79.935	1.5	1.5	56.32	IB	Grade 1				epithelial	serous/papillary
VOC-A-088	76.8	1.87	8.76	55.7	IIIC	Grade 3	< 0.5 cm	yes	Remission > 12 months	other
VOC-A-090	54.8125	1.5	4.55	48.33	IIIC	Grade 3	< 0.5 cm	yes	Remission > 12 months	epithelial	serous/papillary
VOC-A-091	75.5575	0.98	1.27	77.85	IIIC	Grade 3		yes	Remission > 6 months	epithelial	serous/papillary
VOC-A-093	90.1825			54.81	IIC	Grade 3		yes		epithelial	serous/papillary
VOC-A-094	56.005	7.66	7.66	72.42	IIIC		> 2 cm	yes	Remission > 12 months	epithelial	serous/papillary
VOC-A-095	51.9067	1.09	3.8	68.19	IIIC	Grade 3	< 0.5 cm	yes	Remission > 6 months	epithelial	serous/papillary
VOC-A-096	16.13		1.42	77.7	IIIC	Grade 3	< 0.5 cm			epithelial	serous/papillary
VOC-A-098	85.69	7.15	9.25	68.87	IC	Grade 3	no residual	yes	Remission > 12 months	epithelial	serous/papillary
VOC-A-099	90.84			76.59	IIIB	Grade 1	no residual			epithelial	serous/papillary
VOC-A-101	76.6075	4.31	6.57	60.23	IIIC	Grade 2	0.5-2 cm	yes	Remission > 12 months	epithelial	serous/papillary
VOC-A-102	57.485	1.36	2.92	67.9	IV	Grade 3		yes	Remission > 6 months	epithelial	endometrioid
VOC-A-103	85.84			71.3	IA	Grade 3	no residual			epithelial	endometrioid
VOC-A-104	67.6275	4.94	4.94	71.69	IA	Grade 1	no residual			epithelial	endometrioid
VOC-A-105	83.22	9.05	9.05	63.38	IA	Grade 2	no residual			epithelial	endometrioid
VOC-A-106	68.565			55.78	IC		no residual			epithelial	clear cell
VOC-A-107	44.4225	0.97	1.99	45.39	IV	Grade 3	< 0.5 cm	yes	Remission > 6 months	epithelial	serous/papillary
VOC-A-109	24.3933	0.4	0.4	75.36	IIIC	Grade 3	> 2 cm	no		epithelial	mixed
VOC-A-139	32.8133		0.73	56.96	IV	Grade 3				epithelial	endometrioid
VOC-A-141	72.6275	0.63	0.63	40.69	IA	Grade 1				epithelial	endometrioid
VOC-A-142	73.41	1.49	1.49	41.05	IIIC	Grade 3	< 0.5 cm			epithelial	endometrioid
VOC-A-145	78.55	7	7	43.65	IA		no residual	yes	Remission > 12 months	epithelial	clear cell
VOC-A-150	83.03	0.74	0.74	52.77	IA	Grade 1	no residual			epithelial	mucinous
VOC-A-152	81.8567	5.22	5.22	72.21	IC	Grade 1	no residual			epithelial	mucinous
VOC-A-153	76.0967	11.28	11.28	40.16	IA	Grade 1	no residual			epithelial	mucinous
VOC-A-154	27.095	0.09	0.09	60.65	IIIC	Grade 3	< 0.5 cm			epithelial	mucinous
VOC-A-155	18.1133	3.32	4.37	60.24	IIIC	Grade 3	< 0.5 cm	yes	Remission > 12 months	epithelial	serous/papillary
VOC-A-156	0.0333333		3.72	41.17	IV	Grade 3	> 2 cm	yes	Remission > 12 months	epithelial	serous/papillary
VOC-A-157	25.1475	2.89	5.2	85.22	IIIC	Grade 3	> 2 cm	yes	Remission > 12 months	epithelial	serous/papillary
VOC-A-158	78.98	2.49	4.98	70	IIIC	Grade 3	> 2 cm	yes	Remission > 12 months	epithelial	serous/papillary
VOC-A-159	78.69	3.91	3.91	63.3	IIIC	Grade 3	> 2 cm	no		epithelial	serous/papillary
VOC-A-160	1.4425	5.66	5.66	41.65	IIIC	Grade 2	no residual	yes	Remission > 12 months	epithelial	serous/papillary
VOC-A-161	52.635	2.13	9.64	56.67	IIIC	Grade 3	< 0.5 cm	yes	Remission > 12 months	epithelial	serous/papillary
VOC-A-162	92.0025	4.97	4.97	65.84	IC	Grade 3		yes	Remission > 12 months	epithelial	serous/papillary
VOC-A-163	79.7375		1.19	71.83		Grade 3	> 2 cm			epithelial	serous/papillary
VOC-A-164	35.97		4.16	44.78		Grade 3	> 2 cm	no		epithelial	serous/papillary
VOC-A-165	87.7225	5.11	5.11	67.34	IA	Grade 1	no residual			epithelial	serous/papillary
VOC-A-166	87.105			46.11	IA	Grade 1	no residual			epithelial	serous/papillary
VOC-A-167	58.76	1.26	2.33	64.87	IIIC	Grade 3	< 0.5 cm	yes	Remission > 6 months	epithelial	endometrioid
VOC-A-169	74.9133		1.63	51.73	IIC	Grade 1	no residual			epithelial	endometrioid
VOC-A-171	59.0067		3.14	54.82	IIIC	Grade 3	no residual	no		epithelial	endometrioid
VOC-A-173	73.43	4.81	4.81	81.06	IA	Grade 2	no residual			epithelial	endometrioid
VOC-A-174	82.7467	10.96	10.96	56.01	IC	Grade 3	no residual	yes	Remission > 12 months	epithelial	clear cell
VOC-A-178	85.81	1.48	1.48	61.83	IA	Grade 1	no residual			epithelial	mucinous
VOC-A-179	72.65	6.04	8.63	56.16	IIIB	Grade 1	no residual			epithelial	mucinous
VOC-A-180	97.17		11.38	59.98	IC	Grade 3	no residual			epithelial	serous/papillary
VOC-A-181	89.07	6	6	47.76	IA	Grade 2	no residual			epithelial	serous/papillary
VOC-A-182	7.24	2.59	6.56	64.64	IIIC	Grade 3	0.5-2 cm	yes	Remission > 12 months	epithelial	serous/papillary
VOC-A-183	92.435	1.6	5.79	72.34	IIIC	Grade 3	0.5-2 cm	yes	Remission > 12 months	epithelial	serous/papillary
VOC-A-184	49.7833	0.26	0.26	81.15	IV	Grade 3				epithelial	serous/papillary
VOC-A-185	84.065	11.25	11.25	40.05	IC	Grade 2	no residual	yes	Remission > 12 months	epithelial	serous/papillary
VOC-A-188	94.495			62.8	IV	Grade 3	> 2 cm			epithelial	serous/papillary
VOC-A-189	23.55		5.01	73.68	IIIC	Grade 3	> 2 cm	no		epithelial	serous/papillary
VOC-A-190	37.34		4.8	57.64	IIIC	Grade 3	> 2 cm	no		epithelial	serous/papillary
VOC-A-191	57.2267		1.45	83.8	IIIC	Grade 2				epithelial	serous/papillary
VOC-A-192	79.9233		1.16	91.66	IIIC	Grade 2	> 2 cm			epithelial	serous/papillary
VOC-A-193	88.315	12.38	12.38	73.45	IIA	Grade 3	no residual	yes	Remission > 12 months	epithelial	serous/papillary
VOC-A-194	85.49		0.67	82.98	IIIC		0.5-2 cm			epithelial	serous/papillary
VOC-A-195	70.09		0.9	74.01	IIIC	Grade 3	0.5-2 cm			epithelial	serous/papillary
VOC-A-196	71.105	2.38	2.94	72.63	IIIC	Grade 2	< 0.5 cm	yes	Remission > 12 months	epithelial	serous/papillary
VOC-A-197	75.6525	3.28	11.53	44.03	IIIA	Grade 3	no residual	yes	Remission > 12 months	epithelial	serous/papillary
VOC-A-198	76.92	6.36	8.69	65.69	IIC	Grade 3	no residual	yes	Remission > 12 months	epithelial	mixed
VOC-A-199	74.165	0.25	0.25	78.85	IIIC	Grade 1		no		epithelial	serous/papillary
VOC-A-200	84.545	2.42	4.13	79.46	IV	Grade 2	> 2 cm	yes	Remission > 12 months	epithelial	serous/papillary
VOC-A-201	23.45	1.12	1.12	75.65	IIIC	Grade 2	< 0.5 cm	no		epithelial	serous/papillary
VOC-A-202	98.78		0.25	48.95	IB	Grade 1	no residual			epithelial	serous/papillary
VOC-A-203	80.2675	11.86	11.86	40.13	IC	Grade 1	no residual			epithelial	serous/papillary
VOC-A-204	3.43	1.2	1.2	28.81	unstaged	Grade 1	no residual			epithelial	serous/papillary
VOC-A-205	8.64		0.05	57.45	IIIC	Grade 3	0.5-2 cm	no		epithelial	serous/papillary
VOC-A-206	97.615	11.88	11.88	46.16	IA	Grade 1	no residual			epithelial	serous/papillary
VOC-A-207	57.03	0.53	0.53	43.74	IIB	Grade 3		no		epithelial	serous/papillary
VOC-A-208	64.8225	0.13	0.13	60.89	IIIC	Grade 3	> 2 cm			epithelial	endometrioid
VOC-A-209	98.7375	10.46	10.46	53.58	IC	Grade 1	no residual	yes	Remission > 12 months	epithelial	endometrioid
VOC-A-210	71.7725	12.25	12.25	41.52	IC		no residual	yes	Remission > 12 months	epithelial	clear cell
VOC-A-212	37.84	0.69	0.69	68.42	IIIC	Grade 3	0.5-2 cm	no		epithelial	other
VOC-A-214	92.32	2.06	4.73	66.22	IIIC	Grade 3	> 2 cm	yes	Remission > 12 months	other
VOC-A-215	84.6467	0.05	0.05	66.69	IIIC	Grade 3	> 2 cm			epithelial	mucinous
VOC-A-216	27.27	2.25	2.25	66.86	IC	Grade 1				epithelial	mucinous
VOC-A-217	88.0075			41.5		Grade 1				epithelial	serous/papillary
VOC-A-218	80.8475	13.62	13.62	41.45	IC	Grade 1				epithelial	serous/papillary
VOC-A-219	36.8533	1.06	1.06	55.48	IV	Grade 3	> 2 cm			epithelial	serous/papillary
VOC-A-221	38.39			48.92	IIIC	Grade 3	0.5-2 cm	no		epithelial	serous/papillary
VOC-A-222	89.12	0.09	0.09	75.45	IIIC	Grade 3	> 2 cm			epithelial	serous/papillary
VOC-A-223	76.8133	0.92	2.95	64.9	IV	Grade 3	0.5-2 cm	yes	Remission > 6 months	epithelial	serous/papillary
VOC-A-224	84.3975			43.59	IIIC	Grade 2	> 2 cm			epithelial	serous/papillary
VOC-A-225	67.485	12.67	12.67	30.19	IC	Grade 2	no residual	yes	Remission > 12 months	epithelial	serous/papillary
VOC-A-226	79.5575	4.67	11.05	66.71	IIIC	Grade 3	> 2 cm	no		epithelial	serous/papillary
VOC-A-227	13.06	0.93	0.93	67.51	unstaged	Grade 2	0.5-2 cm	no		epithelial	serous/papillary
VOC-A-228	88.005	1.99	3.95	44.69	IIIC	Grade 2	0.5-2 cm	yes	Remission > 12 months	epithelial	serous/papillary
VOC-A-229	54.33	4.18	4.18	52.48	IIIC	Grade 1				epithelial	serous/papillary
VOC-A-230	72.11		3.31	77.4	IV	Grade 3	> 2 cm			epithelial	serous/papillary
VOC-A-231	91.4075	1.4	1.4	44.6	IC	Grade 2	no residual	yes	Remission > 12 months	epithelial	endometrioid
VOC-A-232	57.495		0.19	84.28	IIIC	Grade 3	> 2 cm	no		epithelial	endometrioid
VOC-A-233	38.5625	10.72	10.72	47.2	IIIC	Grade 2	< 0.5 cm	yes	Remission > 12 months	epithelial	endometrioid
VOC-A-234	18.45	0.64	0.64	42.12	IIIA	Grade 3	> 2 cm	no		epithelial	endometrioid
VOC-A-236	15.64	0.97	2.48	42.61	IIIC		< 0.5 cm	yes	Remission > 6 months	epithelial	clear cell
VOC-A-237	49.86	9.48	9.48	70.26	IIIC	Grade 2	0.5-2 cm	yes	Remission > 12 months	epithelial	serous/papillary
VOC-A-238	74.655		4.1	39.58	IA	Grade 1	no residual			epithelial	serous/papillary
VOC-A-239	72.3467	5.65	5.65	31.84	IC	Grade 1	no residual			epithelial	serous/papillary
VOC-A-240	54.1775	16.18	16.18	51.22	IIA	Grade 3				epithelial	endometrioid
VOC-A-241	72.9633	2.86	3.15	47.68	IIIC	Grade 1	< 0.5 cm	yes	Remission > 12 months	epithelial	serous/papillary
VOC-A-242	66.2225	0.63	0.63	46.99	IIIA		no residual	no		epithelial	endometrioid
VOC-A-243	80.2533	11.25		32.45	IIIC	Grade 2				epithelial	serous/papillary
VOC-A-244	47.82		0.17	68.31	IIIC	Grade 3	0.5-2 cm	no		epithelial	serous/papillary
VOC-A-245	21.4	1.76	1.76	47.62	IV	Grade 3		no		epithelial	serous/papillary
VOC-A-246	87.4875		4.15	59.44	IIIC	Grade 2	0.5-2 cm			epithelial	serous/papillary
VOC-A-247	39.8125	2.01	5.01	47.83	IIIC	Grade 2	> 2 cm			epithelial	serous/papillary
VOC-A-248	56.5767		2.31	71.15	IIIC	Grade 3				epithelial	endometrioid
VOC-A-249	96.185		1.29	74.17	IIIC	Grade 3	> 2 cm			epithelial	serous/papillary
VOC-A-250	54.3167		2.23	51.42	IIIB	Grade 3	0.5-2 cm			epithelial	serous/papillary
VOC-A-251	89.7225	2.91	5.91	56.38	IIIC	Grade 2	> 2 cm	yes	Remission > 12 months	epithelial	serous/papillary
VOC-A-252	96.6025	1.84	1.84	`	IIIC	Grade 2	> 2 cm	no		epithelial	serous/papillary
VOC-A-253	68.9925		1.1	70.64	IIIC	Grade 3	0.5-2 cm			epithelial	serous/papillary
VOC-A-254	60.9475	1.48	1.48	74.62		Grade 2	< 0.5 cm	no		epithelial	serous/papillary
VOC-A-255	54.5967		3.7	87.26	IIIC	Grade 3				epithelial	serous/papillary
VOC-A-256	49.5067	3.46	3.46	68.72	IIIC	Grade 3		yes	Remission > 12 months	epithelial	other
VOC-A-257	16.76	1.76	1.76	60.62	IV	Grade 3		no		epithelial	serous/papillary
VOC-A-258	83.5733			58.85	IA	Grade 2				epithelial	mucinous
VOC-A-259	72.76	3.65	15.47	43.76	IIIA	Grade 1	no residual			epithelial	serous/papillary
VOC-A-260	88.63		11.01	36.06	IIIC	Grade 1				epithelial	serous/papillary
VOC-A-261	67.5667			31.13	IIIA	Grade 1				epithelial	mixed
VOC-A-262	45.9		0.02	67.95	IV	Grade 3		no		epithelial	serous/papillary
VOC-A-263	91.595	15.31	15.31	29.37	IA	Grade 1	no residual			epithelial	serous/papillary
VOC-A-264	73.69	9.21	11.02	43.72	IC	Grade 2		yes	Remission > 12 months	epithelial	serous/papillary
VOC-A-265	73.8967			51.75	IC	Grade 2		yes	Remission > 12 months	epithelial	endometrioid
VOC-A-266	80.0033			30.88	IA	Grade 1				epithelial	serous/papillary
VOC-A-267	45.145			51.7	IIIC	Grade 3				epithelial	serous/papillary
VOC-A-268	71.04	1.41	2.89	78.59	IIIC	Grade 3		yes	Remission > 6 months	epithelial	serous/papillary
VOC-A-269	77.415		0.84	63.8	IA	Grade 2				epithelial	endometrioid
VOC-A-270	83.9233	1.58	5.9	58.77	IIIC	Grade 3	> 2 cm	yes	Remission > 12 months	epithelial	serous/papillary
VOC-A-271	51.61	0.81	1.39	76.61	IIIC	Grade 2				epithelial	serous/papillary
VOC-A-272	57.805			58.48	IA	Grade 1				epithelial	mucinous
VOC-A-273	48.6025	3.33	3.33	70.01	IIIC	Grade 3		yes	Remission > 12 months	epithelial	serous/papillary
VOC-A-274	63.19			39.34	IA					epithelial	other
VOC-A-275	93.42	14.65	14.65	42.32	IC	Grade 1				epithelial	serous/papillary
VOC-A-276	72.7067		4.78	53.26	IIIC	Grade 2				epithelial	serous/papillary
VOC-A-277	28.6	0.65	0.65	61.39	IIIC	Grade 3		no		epithelial	endometrioid
VOC-A-278	58.6425	0.98	1.4	61.83	IIIC	Grade 2	< 0.5 cm	yes	Remission > 6 months	epithelial	serous/papillary
VOC-A-279	66.06	1.33	9.48	63.76	IIIC	Grade 3	0.5-2 cm	yes	Remission > 6 months	epithelial	serous/papillary
VOC-A-280	72.0733	4.28	9.73	54.63	IIIC	Grade 2		yes	Remission > 12 months	epithelial	serous/papillary
VOC-A-281	72.28	7.99	7.99	52.21	IV	Grade 3		yes	Remission > 12 months	epithelial	serous/papillary
VOC-A-282	81.1067	1.65	1.65	48.21	IIIC	Grade 2		no		epithelial	serous/papillary
VOC-A-283	74.3833	4.04	6.16	57.43	IIIC	Grade 3		yes	Remission > 12 months	epithelial	mixed
VOC-A-284	12.68	0.12	0.12	78.68	IIIC	Grade 3		no		epithelial	serous/papillary
VOC-A-285	93.1367			74.04	IIIC		> 2 cm			other
VOC-A-286	76.2075	1.42	1.66	75.01	IIIC	Grade 2	< 0.5 cm	yes		epithelial	mucinous
VOC-A-287	88.2	2.06	7.62	68.89	IIIC	Grade 3		yes	Remission > 12 months	epithelial	serous/papillary
